# Supplementary material for: Is brief advice in primary care a cost-effective way to promote physical activity?
Source: PubMed Central journal article supplement — Br J Sports Med. 2013 Dec 18;48(3):202–6. doi: 10.1136/bjsports-2013-092897 (PMC3913207; doi:10.1136/bjsports-2013-092897), 2013-12-18
Supplement: bjsports-2013-092897-s1.pdf [file bjsports-2013-092897-s1.pdf]

**Table 1 (Supplementary File) : Estimates of model parameters**

| Parameter                                            | Value | Source                   | Standard error | Distribution | Alpha  | Beta    |
|------------------------------------------------------|-------|--------------------------|----------------|--------------|--------|---------|
| <b>Relative risks of:</b>                            |       |                          |                |              |        |         |
| Becoming active (year 1) as a result of brief advice | 1.42  | Campbell et al [11]      | 0.19           | lognormal    |        |         |
| Disease (active vs inactive):                        |       |                          |                |              |        |         |
| <i>CHD</i>                                           | 0.90  | Hu et al [16]            | 0.04           | lognormal    |        |         |
| <i>Stroke</i>                                        | 0.86  | Hu et al [17]            | 0.04           | lognormal    |        |         |
| <i>Diabetes</i>                                      | 0.67  | Hu et al [18]            | 0.12           | lognormal    |        |         |
| Non-CVD mortality after:                             |       |                          |                |              |        |         |
| <i>Non-fatal CHD</i>                                 | 1.71  | Bronum-Hansen et al [27] | 0.14           | lognormal    |        |         |
| <i>Non-fatal stroke</i>                              | 1.71  | Bronum-Hansen et al [27] | 0.14           | lognormal    |        |         |
| <i>Diabetes</i>                                      | 1.49  | Pries et al [28]         | 0.13           | lognormal    |        |         |
| CVD mortality after:                                 |       |                          |                |              |        |         |
| <i>Non-fatal CHD</i>                                 | 3.89  | Bronum-Hansen et al [27] | 0.04           | lognormal    |        |         |
| <i>Non-fatal stroke</i>                              | 3.89  | Bronum-Hansen et al [27] | 0.04           | lognormal    |        |         |
| <i>Diabetes</i>                                      | 2.61  | Pries et al [28]         | 0.14           | lognormal    |        |         |
| <b>Fatality cases:</b>                               |       |                          |                |              |        |         |
| CHD:                                                 |       |                          |                |              |        |         |
| <i>33-34 years</i>                                   | 8.77% | Ward et al [29]          | 0.88%          | beta         | 91.139 | 947.722 |
| <i>35-44 years</i>                                   | 8.77% |                          | 0.88%          | beta         | 91.139 | 947.722 |
| <i>45-54 years</i>                                   | 8.77% |                          | 0.88%          | beta         | 91.139 | 947.722 |

| Parameter                   | Value  | Source                           | Standard error | Distribution | Alpha    | Beta       |
|-----------------------------|--------|----------------------------------|----------------|--------------|----------|------------|
| <i>55-64 years</i>          | 11.55% |                                  | 1.16%          | beta         | 88.331   | 676.245    |
| <i>65-74 years</i>          | 21.07% |                                  | 2.11%          | beta         | 78.724   | 294.997    |
| <i>75+ years</i>            | 14.76% |                                  | 1.48%          | beta         | 85.089   | 491.280    |
| <b>Stroke:</b>              |        |                                  |                |              |          |            |
| <i>33-34 years</i>          | 23.46% | Ward et al [29]                  | 2.35%          | beta         | 76.302   | 248.889    |
| <i>35-44 years</i>          | 23.46% |                                  | 2.35%          | beta         | 76.302   | 248.889    |
| <i>45-54 years</i>          | 23.46% |                                  | 2.35%          | beta         | 76.302   | 248.889    |
| <i>55-64 years</i>          | 23.28% |                                  | 2.33%          | beta         | 76.488   | 252.077    |
| <i>65-74 years</i>          | 23.47% |                                  | 2.35%          | beta         | 76.299   | 248.845    |
| <i>75+ years</i>            | 23.42% |                                  | 2.34%          | beta         | 76.346   | 249.638    |
| <b>Incidence rates for:</b> |        |                                  |                |              |          |            |
| <b>CHD:</b>                 |        |                                  |                |              |          |            |
| <i>33-34 years</i>          | 0.00%  | Ward et al;<br>[29] NCGC<br>[30] | 0.00%          | beta         | 10.345   | 295572.655 |
| <i>35-44 years</i>          | 0.05%  |                                  | 0.00%          | beta         | 137.446  | 295445.554 |
| <i>45-54 years</i>          | 0.21%  |                                  | 0.01%          | beta         | 619.246  | 294963.754 |
| <i>55-64 years</i>          | 0.63%  |                                  | 0.01%          | beta         | 1865.129 | 293717.871 |
| <i>65-74 years</i>          | 0.97%  |                                  | 0.02%          | beta         | 2867.155 | 292715.845 |
| <i>75+ years</i>            | 0.97%  |                                  | 0.02%          | beta         | 2867.155 | 292715.845 |
| <b>Stroke:</b>              |        |                                  |                |              |          |            |
| <i>33-34 years</i>          | 0.01%  | Ward et al;<br>[29] NCGC<br>[30] | 0.00%          | beta         | 8.400    | 104990.600 |
| <i>35-44 years</i>          | 0.02%  |                                  | 0.00%          | beta         | 24.150   | 104974.850 |
| <i>45-54 years</i>          | 0.06%  |                                  | 0.01%          | beta         | 59.849   | 104939.151 |
| <i>55-64 years</i>          | 0.29%  |                                  | 0.02%          | beta         | 305.547  | 104693.453 |
| <i>65-74 years</i>          | 0.69%  |                                  | 0.03%          | beta         | 724.493  | 104274.507 |
| <i>75+ years</i>            | 1.43%  |                                  | 0.04%          | beta         | 1505.686 | 103493.314 |
| <b>Diabetes:</b>            |        |                                  |                |              |          |            |

| <b>Parameter</b>                     | <b>Value</b> | <b>Source</b>                  | <b>Standard error</b> | <b>Distribution</b> | <b>Alpha</b> | <b>Beta</b> |
|--------------------------------------|--------------|--------------------------------|-----------------------|---------------------|--------------|-------------|
| <i>33-39 years</i>                   | 0.01%        | Gonzalez et al [31]            | 0.00%                 | beta                | 165.922      | 1842669.078 |
| <i>40-49 years</i>                   | 0.03%        |                                | 0.00%                 | beta                | 516.645      | 1842318.355 |
| <i>50-59 years</i>                   | 0.06%        |                                | 0.00%                 | beta                | 1164.291     | 1841670.709 |
| <i>60-69 years</i>                   | 0.10%        |                                | 0.00%                 | beta                | 1851.181     | 1840983.819 |
| <i>70-79 years</i>                   | 0.11%        |                                | 0.00%                 | beta                | 2055.837     | 1840779.163 |
| <i>80+ years</i>                     | 0.11%        |                                | 0.00%                 | beta                | 2055.837     | 1840779.163 |
| <b>Age specific quality of life:</b> |              |                                |                       |                     |              |             |
| <i>33-34 years</i>                   | 0.90         | Health Survey for England [32] | 0.01                  | beta                | 2893.500     | 321.500     |
| <i>35-44 years</i>                   | 0.86         |                                | 0.01                  | beta                | 2127.640     | 346.360     |
| <i>45-54 years</i>                   | 0.82         |                                | 0.01                  | beta                | 1536.680     | 337.320     |
| <i>55-64 years</i>                   | 0.78         |                                | 0.01                  | beta                | 2507.700     | 707.300     |
| <i>65-74 years</i>                   | 0.72         |                                | 0.01                  | beta                | 1148.400     | 446.600     |
| <b>Health state utility weight:</b>  |              |                                |                       |                     |              |             |
| Healthy                              | 1.00         | Ward et al; [33] NCGC [30]     | 0.10                  | gamma               | 100.000      | 0.010       |
| CHD 1st event                        | 0.80         |                                | 0.08                  | gamma               | 100.000      | 0.008       |
| Post CHD 1st event                   | 0.92         |                                | 0.09                  | gamma               | 100.000      | 0.009       |
| Stroke 1st event                     | 0.63         |                                | 0.06                  | gamma               | 100.000      | 0.006       |
| post stroke 1st event                | 0.65         |                                | 0.07                  | gamma               | 100.000      | 0.007       |
| Diabetes                             | 0.90         |                                | 0.09                  | gamma               | 100.000      | 0.009       |
| Mental health                        | 0.07         |                                | 0.04                  | beta                | 2.413        | 31.100      |
| <b>Cost* of:</b>                     |              |                                |                       |                     |              |             |
| Brief advice                         | £9           | Boehler et al [15]             | £1                    | normal              |              |             |

| <b>Parameter</b>      | <b>Value</b> | <b>Source</b> | <b>Standard error</b> | <b>Distribution</b> | <b>Alpha</b> | <b>Beta</b> |
|-----------------------|--------------|---------------|-----------------------|---------------------|--------------|-------------|
| CHD 1st event         | £3,947       | NCGC [30]     | £395                  | normal              |              |             |
| Post CHD 1st event    | £451         |               | £45                   | normal              |              |             |
| Stroke 1st event      | £10,190      |               | £1,019                | normal              |              |             |
| Post stroke 1st event | £2,238       |               | £224                  | normal              |              |             |
| Diabetes              | £910         |               | £91                   | normal              |              |             |

\*Costs are expressed in 2010/11 prices.
