# Supplementary material for: Is brief advice in primary care a cost-effective way to promote physical activity?
Source: PubMed Central journal article supplement — Br J Sports Med. 2013 Dec 18;48(3):202–6. doi: 10.1136/bjsports-2013-092897 (PMC3913207; doi:10.1136/bjsports-2013-092897), 2013-12-18
Supplement: bjsports-2013-092897-s2.pdf [file bjsports-2013-092897-s2.pdf]

**Table 3 (Supplementary File): Impact of changing assumptions (one-way sensitivity analyses) on cost effectiveness of brief advice**

| <b>Parameter</b>                                                                                                              | <b>Incremental cost (£)</b> | <b>Incremental effect (QALY)</b> | <b>ICER (£)</b> |
|-------------------------------------------------------------------------------------------------------------------------------|-----------------------------|----------------------------------|-----------------|
| Base case result                                                                                                              | £806,809                    | 466                              | £1,730          |
| <i>Effectiveness of brief advice-RR (base case=1.42 ) [11]</i>                                                                |                             |                                  |                 |
| 1.10                                                                                                                          | £914,869                    | 115                              | £7,960          |
| 1.20                                                                                                                          | £880,294                    | 227                              | £3,871          |
| 1.26                                                                                                                          | £859,905                    | 294                              | £2,928          |
| 1.30                                                                                                                          | £846,458                    | 337                              | £2,508          |
| 1.50                                                                                                                          | £780,942                    | 551                              | £1,418          |
| 1.71                                                                                                                          | £715,133                    | 765                              | £935            |
| 1.75                                                                                                                          | £702,933                    | 804                              | £874            |
| 2.00                                                                                                                          | £629,029                    | 1045                             | £602            |
| 2.2                                                                                                                           | £572,715                    | 1228                             | £466            |
| <i>RR for developing disease conditions (base case=protective effects persists up to 10 years) [16-18]</i>                    |                             |                                  |                 |
| Protective effects persist over lifetime (applying the same RR used for the 10 years for the rest of the years)               | -£420,700                   | 731                              | dominant        |
| Protective effects persist just for a year (apply RR to first year( rather than 10 years) and the remaining years take RR =1) | £942,129                    | 439                              | £2147           |
| <i>Start-up age for the cohort (base case=33 years)[11]</i>                                                                   |                             |                                  |                 |

| <b>Parameter</b>                                                                                    | <b>Incremental cost (£)</b> | <b>Incremental effect (QALY)</b> | <b>ICER (£)</b> |
|-----------------------------------------------------------------------------------------------------|-----------------------------|----------------------------------|-----------------|
| 50 years                                                                                            | £243,117                    | 583                              | £417            |
| 53 years                                                                                            | £60,458                     | 629                              | £96             |
| 54 years                                                                                            | -£2,153                     | 644                              | dominant        |
| 60 years                                                                                            | -£257,983                   | 681                              | dominant        |
| <i>Discount rate at 1.5% for both QALYs and costs (Base case=3.5%) [23]</i>                         | £747,345                    | 491                              | £1,522          |
| <i>Cost of intervention (base case=£9.50 per person) [15]</i>                                       |                             |                                  |                 |
| Recruitment to brief advice via disease register (i.e. cost of intervention is £57.45 per person)   | £5,602,005                  | 466                              | £12,010         |
| Brief advice delivered by health care assistants (i.e. cost of intervention is £8.03 per person)    | £743,831                    | 466                              | £1,595          |
| Brief advice lasting 5 mins and delivered by nurse (i.e. cost of intervention is £3.58 per person)* | £214,609                    | 466                              | £406            |
| Brief advice lasting 20 mins and delivered by GP (i.e. cost of intervention is £51 per person)*     | £4,956,609                  | 466                              | £10,627         |
| <i>Short-term mental health gain [22]</i>                                                           |                             |                                  |                 |
| <i>If mental health gain was reduced from 0.07 to:</i>                                              |                             |                                  |                 |
| 0.06                                                                                                | £806,809                    | 394                              | £2,050          |
| 0.04                                                                                                | £806,809                    | 272                              | £2,966          |

| <b>Parameter</b>                                                                     | <b>Incremental cost (£)</b> | <b>Incremental effect (QALY)</b> | <b>ICER (£)</b> |
|--------------------------------------------------------------------------------------|-----------------------------|----------------------------------|-----------------|
| 0.02                                                                                 | £806,809                    | 150                              | £5,363          |
| 0.01                                                                                 | £806,809                    | 90                               | £8,997          |
| 0                                                                                    | £806,809                    | 20                               | £27,913         |
| <i>If the period that mental health gain lasted for is increased from 1 year to:</i> |                             |                                  |                 |
| 2 years                                                                              | £806,809                    | 889                              | £908            |
| 5 years                                                                              | £806,809                    | 2,070                            | £390            |

\*Data was based on Personal Social Services Research Unit [24]
